# 1 **Mutation rate of SARS-CoV-2 and emergence of mutators during** 2 **experimental evolution**

3 Massimo Amicone<sup>1\*</sup>, Vítor Borges<sup>2\*</sup>, Maria João Alves<sup>3\*</sup>, Joana Isidro<sup>2\*</sup>, Líbia Zé-Zé<sup>3,4</sup>,  
4 Sílvia Duarte<sup>5</sup>, Luís Vieira<sup>5,6</sup>, Raquel Guiomar<sup>7</sup>, João Paulo Gomes<sup>2✉</sup>, Isabel Gordo<sup>1✉</sup>

5

6 \*These authors contributed equally to this work.

7 <sup>1</sup>Instituto Gulbenkian de Ciência, Oeiras, Portugal.

8 <sup>2</sup>Bioinformatics Unit, Department of Infectious Diseases, National Institute of Health  
9 Doutor Ricardo Jorge (INSA), Lisbon, Portugal.

10 <sup>3</sup>Centre for Vectors and Infectious Diseases Research, Department of Infectious  
11 Diseases, National Institute of Health Doutor Ricardo Jorge (INSA), Águas de Moura,  
12 Portugal.

13 <sup>4</sup>BioISI - Biosystems & Integrative Sciences Institute, Faculty of Sciences, University of  
14 Lisbon, Portugal.

15 <sup>5</sup>Innovation and Technology Unit, Department of Human Genetics, National Institute of  
16 Health Doutor Ricardo Jorge (INSA), Lisbon, Portugal.

17 <sup>6</sup>Centre for Toxicogenomics and Human Health (ToxOmics), Genetics, Oncology and  
18 Human Toxicology, Nova Medical School|Faculdade de Ciências Médicas, Universidade  
19 Nova de Lisboa, Lisbon, Portugal.

20 <sup>7</sup>National Reference Laboratory for Influenza and other Respiratory Viruses,  
21 Department of Infectious Diseases, National Institute of Health Doutor Ricardo Jorge  
22 (INSA), Lisbon, Portugal.

23

24 ✉e-mail: [igordo@igc.gulbenkian.pt](mailto:igordo@igc.gulbenkian.pt); [j.paulo.gomes@insa.min-saude.pt](mailto:j.paulo.gomes@insa.min-saude.pt)

25

26 Abstract: 219 words; Main text: 4618 words; Figures: 5.

## 27 **Abstract**

28 **Background and objectives.** To understand how organisms evolve, it is fundamental  
29 to study how mutations emerge and establish. Here, we estimated the rate of mutation  
30 accumulation of SARS-CoV-2 *in vitro* and investigated the repeatability of its evolution  
31 when facing a new cell type but no immune or drug pressures.

32 **Methodology.** We performed experimental evolution with two strains of SARS-CoV-2,  
33 one carrying the originally described spike protein (CoV-2-D) and another carrying the  
34 D614G mutation that has spread worldwide (CoV-2-G). After 15 passages in Vero cells  
35 and whole genome sequencing, we characterized the spectrum and rate of the emerging  
36 mutations and looked for evidences of selection across the genomes of both strains.

37 **Results.** From the mutations accumulated, and excluding the genes with signals of  
38 selection, we estimate a spontaneous mutation rate of  $1.25 \times 10^{-6}$  nt<sup>-1</sup> per infection cycle  
39 for both lineages of SARS-CoV-2. We further show that mutation accumulation is  
40 heterogeneous along the genome, with the spike gene accumulating mutations at rate  
41 five-fold higher than the genomic average. We also observe the emergence of mutators in  
42 the CoV-2-G background, likely linked to mutations in the RNA-dependent RNA  
43 polymerase and/or in the error-correcting exonuclease protein.

44 **Conclusions and implications.** These results provide valuable information on how  
45 spontaneous mutations emerge in SARS-CoV-2 and on how selection can shape its  
46 genome towards adaptation to new environments.

## 47 **Lay summary**

48 Mutation is the ultimate source of variation. We estimated how the SARS-COV-2 virus—  
49 cause of the COVID-19 pandemic—mutates. Upon infecting cells, its genome can change  
50 at a rate of 0.04 per replication. We also find that this rate can change and that its spike  
51 protein can adapt, even within few replications.

## 52 **Background and objectives**

53 Mutation is the principal process driving the origin of genetic diversity. The mutation rate  
54 is a function of replication fidelity and represents the intrinsic rate at which genetic  
55 changes emerge prior to selection. The substitution rate, instead, is a measure of

56 mutation accumulation in a given period of time and embeds the effects of selection[1].  
57 These rates and the spectrum of the emerging mutations are fundamental parameters to  
58 understand how an organism evolves and how new variants are purged from, or establish  
59 in natural populations.

60 In DNA based microbes the genomic mutation rate per cell per generation, measured in  
61 laboratory conditions, is close to a constant[2]. On the other hand, for RNA viruses there  
62 is a remarkable variation in their replication fidelity[3,4]. The basic mutation rates,  
63 expressed as nucleotide substitutions per site per cell infection (s/n/c), vary between  $10^{-6}$   
64 to  $10^{-3}$  for the several positive ssRNA viruses which have been studied[5]. Importantly,  
65 our current knowledge of the mutation rate of the human beta-coronavirus SARS-CoV-2,  
66 which is the cause of the COVID-19 pandemic[6], is based on estimates from different  
67 coronaviruses[5,7,8] and still lacks a direct quantification[9].

68 Laboratory evolution experiments with microbial populations allow to determine how  
69 fast mutations accumulate[10,11], and combining them with high-throughput  
70 sequencing is one of the best methods to estimate mutation rates, determine how they  
71 vary along the genome[12] and study the extent to which convergent evolution  
72 occurs[13,14].

73 Here, via experimental evolution of two natural variants of SARS-CoV-2[15] and whole  
74 genome sequencing, we characterized the spectrum and rates of their emerging  
75 mutations, and identified specific targets of selection. Such information is important for  
76 better understanding the basic biology of this virus and to quantify how predicable the  
77 evolution of strains with different transmission capabilities can be. It may also help  
78 determining some potential genomic constraints of the virus, which are key to the design  
79 of evolution proof vaccines and antiviral drugs.

80

## 81 **Methodology**

### 82 **Virus growth and *in vitro* assay**

83 Vero E6 (African green monkey, *Cercopithecus aethiops* kidney epithelial cells, ATCC®  
84 CRL 1586™) cells were cultured at 37°C and 5% CO<sub>2</sub> in Minimum Essential Medium (MEM  
85 1X, Gibco®) supplemented with 10% fetal bovine serum (FBS), penicillin (100 units/ml)  
86 and streptomycin (100 µg/ml) + fungizone. The two clinical isolates  
87 Portugal/PT0054/2020 and Portugal/PT1136/2020, isolated at the National Institute of

88 Health Doutor Ricardo Jorge (INSA), were used to produce the ancestors of the  
89 experimental evolution, CoV-2-D and CoV-2-G, which seeded the two laboratory  
90 evolution experiments. For this, the initial SARS-CoV-2 stock was produced by infecting  
91 Vero E6 cells (freshly grown for 24 h) and incubating the cells for 72 h. The culture  
92 supernatant was stored in aliquots at -80°C. The TCID<sub>50</sub> of viral stock was calculated  
93 according to the method of Reed and Muench[16]. All work with infectious SARS-CoV-2  
94 strains was done inside a class III microbiological safety cabinet in a containment level 3  
95 facility at the Centre for Vectors and Infectious Diseases Research (INSA).  
96 From the stored stocks, two 96-well plates fully inoculated with 50 µl of Vero E6 cells  
97 ( $2.0 \times 10^4$  cells) grown for 24 h were infected with 50 µl of the SARS-CoV-2 strains viral  
98 suspension ( $2.0 \times 10^3$  viruses) at a multiplicity of infection (MOI) of 0.1. MEM  
99 supplemented with 10% FBS, penicillin (100 units/ml) and streptomycin (100 µg/ml) +  
100 fungizone was added to each well (50 µl) and the plates were incubated for 24 h. Each  
101 well had a final volume of 150 µl. Every day, for 15 days, serial passages were done by  
102 passaging 50 µl of the culture supernatant to 96-well plates (one for each SARS-CoV-2  
103 strain under study) fully inoculated with 50 µl of Vero E6 cells ( $2.0 \times 10^4$  cells) using the  
104 same procedure and incubated in the same conditions. At day 15, total nucleic acids  
105 were extracted from 100 µl of viral suspension of each well in each plate (96 samples of  
106 day 15<sup>th</sup> for each strain) using the automated platform NUCLISENS easyMAG  
107 (Biomérieux). Confirmation of nucleic acid integrity and rough concentration estimative  
108 was made before sequencing experiment by RT-qPCR of 8 random chosen samples from  
109 each plate at day 15 (CoV-2-D and CoV-2-G) using Novel Coronavirus (2019-nCoV) RT-  
110 PCR Detection Kit (Fosun Diagnostics). Samples from inoculation suspension (day 1)  
111 were also analyzed. All samples presented values of 7-10 Ct (Cycle threshold). When we  
112 infect the cells with  $2 \times 10^3$  particle forming units (PFU), after 24 h the number of PFUs is  
113 around  $2 \times 10^6$ . So, assuming no major fluctuations in the viral load of the transferred  
114 suspension throughout the 15 passages and assuming a yield of approximately 1000  
115 PFU/cell[9], the estimated number of replication cycles per passage is around 1  
116 (i.e.  $\ln(2 \times 10^6 / 2 \times 10^3) / \ln(10^3)$ ).

117

### 118 **SARS-CoV-2 genome sequencing and bioinformatics analysis**

119 Genome sequencing was performed at INSA following an amplicon-based whole-genome  
120 amplification strategy using tiled, multiplexed primers[17], according to the ARTIC

121 network protocol (<https://artic.network/ncov-2019;>  
122 <https://www.protocols.io/view/ncov-2019-sequencing-protocol-bbmuik6w>) with  
123 slight modifications, as previously described[15]. Briefly, after cDNA synthesis, whole-  
124 genome amplification was performed using two separate pools of tiling primers [pools 1  
125 and 2; primers version V3 (218 primers) was used for all samples:  
126 [https://github.com/artic-network/artic-](https://github.com/artic-network/artic-ncov2019/tree/master/primer_schemes/nCoV-2019)  
127 [ncov2019/tree/master/primer\\_schemes/nCoV-2019](https://github.com/artic-network/artic-ncov2019/tree/master/primer_schemes/nCoV-2019)]. The two pools of multiplexed  
128 amplicons were then pooled for each sample, followed by post PCR clean-up and Nextera  
129 XT dual-indexed library preparation, according to the manufacturers' instructions.  
130 Sequencing libraries were paired-end sequenced (2x150 bp) on an Illumina NextSeq 550  
131 apparatus, as previously described[18]. Sequence read quality analysis and mapping was  
132 conducted using the bioinformatics pipeline implemented in INSaFLU  
133 ([https://insaflu.insa.pt/;](https://insaflu.insa.pt/) [https://github.com/INSAFLU;](https://github.com/INSAFLU)  
134 [https://insaflu.readthedocs.io/en/latest/;](https://insaflu.readthedocs.io/en/latest/) as of 10 March 2021), which is a web-based  
135 (and also locally installable) platform for amplicon-based next-generation sequencing  
136 data analysis[18]. We performed raw reads quality analysis using FastQC v0.11.9  
137 (<https://www.bioinformatics.babraham.ac.uk/projects/fastqc>), followed by quality  
138 improvement using Trimmomatic v.0.27  
139 (<http://www.usadellab.org/cms/index.php?page=trimmomatic>; HEADCROP:30 CROP:90  
140 SLIDINGWINDOW:5:20 LEADING:3 TRAILING:3 MINLEN:35 TOPHRED33), with reads being  
141 conservatively cropped 30 bp at both ends for primer clipping. Reference-based mapping  
142 was performed against the Wuhan-Hu-1/2019 reference genome sequence  
143 (<https://www.ncbi.nlm.nih.gov/nuccore/MN908947.3>; NC\_045512.2) using the Burrow-  
144 Wheeler Aligner (BWA\_MEM) v.0.7.12 (r1039) (<http://bio-bwa.sourceforge.net/>)[19]  
145 integrated in multisoftware tool Snippy (<https://github.com/tseemann/snippy>)  
146 available in INSaFLU. The obtained median depth of coverage throughout the genome for  
147 CoV-2-D and CoV-2-G samples (except two samples excluded due to low coverage) was  
148 4807 (IQR=3969-5242) and 5154 (IQR=4802-5439), respectively. Variant (SNP/indels)  
149 calling was performed over BAM files using LoFreq v.2.1.5 (*call* mode, including *--call-*  
150 *indels*)[20], with indel qualities being assessed using Dindel[21]. Mutation frequency  
151 analysis was dynamic and contingent on the depth of coverage of each processed site, e.g.  
152 minor mutations at "allele" frequencies of 10%, 2% and 1% (minimum cut-off used) were  
153 validated for sites with depth of coverage of at least 100-fold, 500-fold and 1000-fold,

154 respectively. The median depth coverage per site for all validated mutations in CoV-2-D  
155 and CoV-2-G samples was 4219 (IQR=2508-6649) and 6424 (IQR=3076-10104),  
156 respectively. In order to assess if proximal SNPs and/or indels belong to the same  
157 mutational event (and thus, avoid overestimating the mutation rate), we identified all  
158 consecutive mutations separated by  $\leq 12$  bp. The mutations more likely to represent a  
159 single mutation event, i.e., those with similar frequencies (differing by  $\leq 2.5\%$ ), were  
160 further visually inspected using IGV (<http://software.broadinstitute.org/software/igv/>)  
161 to confirm/exclude their co-localization in the same reads. In total, this curation led to the  
162 identification 37 SNPs/indels that were collapsed into 13 complex or multi-nucleotide  
163 polymorphisms (MNP). The effect of mutations on genes and predicted protein sequences  
164 was determined using Ensembl Variant Effect Predictor (VEP) version 103.1  
165 (<https://github.com/Ensembl/ensembl-vep>; available as a self-contained Docker  
166 image)[22]. To obtain a refined annotation including all ORF1ab sub-peptides, the GFF3  
167 genome annotation file (relative to the reference Wuhan-Hu-1/2019 genome of SARS-  
168 CoV-2, acc. no. NC\_045512.2) available in the coronapp COVID-19 genome annotator  
169 (<http://giorgilab.unibo.it/coronannotator/>)[23] was adapted to generate an annotation  
170 GTF file for input for the *--gtf* parameter. The parameter *--distance* was set to 0.  
171 **Supplementary Table 1** summarizes all mutations detected in this study and their  
172 distribution across clinical, ancestral cultures and end-point cultured lines (15<sup>th</sup>  
173 passage). SARS-CoV-2 consensus sequences obtained directly from clinical samples for  
174 CoV-2-D (Portugal/PT0054/2020) and CoV-2-G (Portugal/PT1136/2020) viruses are  
175 available in GISAID under the accession numbers EPI\_ISL\_421457 and EPI\_ISL\_511683,  
176 respectively. Reads generated at the end of the experimental evolution study were  
177 deposited in the European Nucleotide Archive (ENA)  
178 (<https://www.ebi.ac.uk/ena/data/view/PRJEB43731>).

179

## 180 **Simulations of the neutral mutation accumulation**

181 To obtain a non-equilibrium neutral expectation of the site frequency spectrum of  
182 mutations, we performed forward-simulations to model mutation accumulation using  
183 the mutation rate inferred from the experiment. We model an organism with a bi-allelic  
184 genome of size  $L=30000$  (~SARS-CoV-2). An initially isogenic population undergoes 15  
185 cycles of growth, mutation and bottleneck, according to the following life cycle:

186 1. A clonal population starts with an inoculum size of 2000.



- 187 2. Each genome replicates  $X$  times. We assume the burst size  $X$  to be Poisson  
188 distributed with mean 1000.
- 189 3. For each of the replicating genomes we introduce a Poisson number of mutations  
190 with mean 0.1 (corresponding to a rate of  $3.3 \times 10^{-6} \text{ nt}^{-1} \text{ cycle}^{-1}$ ). We assume  
191 mutations to emerge with uniform probability in the parental genome and we  
192 allow for back-mutation.
- 193 4. After replication and mutation, we sample 1/1000 of the individual genomes.
- 194 5. Repeat steps 2-4, 15 times.

195 We validated the simulation code by confirming expected outcomes: mutations  
196 accumulate linearly over time and the posterior estimation of the mutation rate retrieves  
197 the original value (bottom plot in **Fig. S3b**).

198 After 15 cycles we collect the artificial genomes from 100 independent simulations, and  
199 compute their site frequency spectrum as in the experiment. In order to test whether  
200 cross-well contamination could justify the observed site frequency distribution, we  
201 modified the previous algorithm by introducing migration. At each cycle  $t$ , after each  
202 bottleneck event, a fraction of viral genomes ( $m=0.1$ ) is replaced by migrants sampled  
203 from a pool of genomes that have undergone  $t$  cycles of growth. The algorithm was  
204 written in R (version 3.6.1) and the results analyzed in RStudio[24].

205

## 206 **Mutation accumulation rates in all, synonymous and non-synonymous sites**

207 To quantify the rate at which mutations accumulate during the experiment, we compute

208  $M_a(r) = \frac{\sum f_r}{P * L_r}$ , where  $f_r$  is the frequency of all mutations observed in region  $r$ ,  $P=15$  the

209 number of passages and  $L_r$  the length of region  $r$ . For the genome-wide mutation  
210 accumulation  $L_r = 29903$ , the entire genome of SARS-CoV-2. We also computed the  
211 mutation accumulation rates at synonymous and non-synonymous sites. In these cases,

212 the synonymous rate is given by  $M_a(r, syn) = \frac{\sum f_r}{P * L_r * p_{r, syn}}$ , where  $p_{r, syn}$  is the proportion

213 of mutations in region  $r$ , leading to synonymous changes. Equivalently the non-

214 synonymous rate is  $M_a(r, n\_syn) = \frac{\sum f_r}{P * L_r * p_{r, n\_syn}}$ . In practice, assume the region of interest

215 has sequence  $r$ : ATGTTT. For each base we count the proportion of mutations that would

216 change (or not) the corresponding amino acid. In the example  $p_{r, n\_syn} = 3/3 + 3/3 +$

217  $3/3 + 3/3 + 3/3 + 2/3 = 17/18$ , 17 mutations out of the possible 18 are non-

218 synonymous and only one is synonymous (ATGTTc). Therefore, in this example, the total  
219 size is  $L_r = 6$ ,  $p_{r,n\_syn} = 17/18$  and  $p_{r,syn} = 1/18$ . Following this method, we calculated  
220 the genome-wise and gene-specific mutation accumulation rates in all, synonymous or  
221 non-synonymous sites (**Fig. 1-4** and **Fig. S4-5**). The genomic sequences of each region  
222 were retrieved from NCBI (entry: [NC 045512](#)).

223

## 224 **pN/pS calculation and confidence interval**

225 Within a given region  $r$ , we computed  $pN(r)$  as the summed frequencies of all the  
226 observed non-synonymous mutations over the number of all possible non-synonymous  
227 changes in that region:  $pN(r) = \frac{\sum f_r}{N_{r,n\_syn}}$ , where  $N_{r,n\_syn} = 3L_r p_{r,n\_syn}$ . Equivalently, we

228 computed the synonymous counterpart:  $pS(r) = \frac{\sum f_r}{N_{r,syn}}$ . In the previous example, within

229 the region  $r$ : ATGTTT,  $N_{r,n\_syn} = 17$  while  $N_{r,syn} = 1$ . Finally, the  $pN/pS$  statistics is the

230 ratio of  $pN$  and  $pS$  and its expected value is 1 under neutrality. To test the deviation from

231 1, we report the  $pN/pS$  together with its confidence interval. Being the  $pN/pS$  a ratio of

232 proportions, we computed the 95% confidence intervals of risk ratios, specifically as

233 
$$\left( e^{\ln\left(\frac{pN}{pS}\right) + z \sqrt{\frac{1-pN}{N_{n\_syn} * pN} + \frac{1-pS}{N_{syn} * pS}}}, e^{\ln\left(\frac{pN}{pS}\right) - z \sqrt{\frac{1-pN}{N_{n\_syn} * pN} + \frac{1-pS}{N_{syn} * pS}}} \right),$$
 with critical  $z = 1.96$ .

## 234 **Results**

### 235 **Experimental evolution design and ancestor backgrounds.**

236 Two SARS-CoV-2 viral strains were isolated from two non-related patients for continuous  
237 propagation in Vero cells (see Methodology, **Fig. 1a**). These were chosen according to  
238 their polymorphism at amino acid position 614 of the spike protein: CoV-2-D carries a D  
239 and CoV-2-G carries a derived mutation which changes the D into a G. This D614G  
240 mutation in spike emerged early in the pandemic, increased the infectivity of the virus  
241 and became prevalent worldwide[25]. Here, we want to test for differences in their  
242 mutation rates, spectrum and/or in the selective forces as the strains are propagated in  
243 cells.

244 In order to discriminate *de novo* mutations from standing genetic variation, we identified  
245 the mutations (relative to the Wuhan-Hu-1/2019 reference genome sequence, Wu et al.,  
246 2020) that were already present at the start of our evolution experiment (see the list and  
247 their frequencies in **Fig. S1**).



248 If the mutation rate is similar to that of the mouse hepatitis virus (MHV) or that of the  
249 SARS-CoV (about  $3.5 \times 10^{-6}$  and  $2.5 \times 10^{-6}$  nt<sup>-1</sup> cycle<sup>-1</sup>, respectively)[5,7] hundreds of  
250 mutations should accumulate, many of which are expected to be neutral but some could  
251 reflect adaptation to the experimental conditions.

252

### 253 **Mutation accumulation and spectrum after 15 passages of SARS-CoV-2 evolution.**

254 We considered *de novo* mutations those that reached a frequency of at least 1%,  
255 supported by a minimum of 10 reads and that were not detected in either the ancestor or  
256 the original clinical isolate from which the ancestor was derived (full list in  
257 **Supplementary Table 1**). Propagation of the 96 CoV-2-D derived lines resulted in 1753  
258 *de novo* mutations, while the 96 lines derived from CoV-2-G resulted in 6181 *de novo*  
259 mutations (n=94 as in two lines the sequencing had poor coverage) (**Fig. 1b**). The much  
260 higher number of mutations in the CoV-2-G background, compared to CoV-2-D, is  
261 explained by 15 of these lines where many more mutations were observed (**Fig. 1b**).  
262 These lines, hereafter referred to as mutators, are characterized by a larger proportion  
263 of SNPs compared to the non-mutator lines where, instead, deletions account for more  
264 than 20% of all *de novo* mutations (**Fig. 1c**).

265 The frequency of mutator clones was estimated to be between 1 and 2% after 15 infection  
266 cycles, since these were the frequencies measured for the vast majority of mutations  
267 observed in the mutator lines. The genetic cause of the mutator phenotype is difficult to  
268 determine but it could likely be hidden within the mutations that occurred in the RNA-  
269 dependent RNA polymerase (Nsp12) and/or in the error-correcting exonuclease protein  
270 (Nsp14)[8]. Indeed, looking at the mutations that are specific to the lineages with  
271 mutators, we found 8 non-synonymous mutations in Nsp12 (one leading to a stop at  
272 amino-acid 670) and 9 non-synonymous mutations in Nsp14 (one leading to a stop at  
273 amino acid 78) (**Supplementary Tables 2-3**). Any of these mutations could potentially  
274 lead to the observed change in mutation rate, but none of these have been associated with  
275 an increased mutational load of the circulating viruses[27].

276 Next, we obtained the per-base per-passage rate at which mutations accumulated ( $M_a$ ),  
277 from the frequencies of the observed mutations. As a 24 h passage in our experiment  
278 corresponds to ~1 cell replication cycle (see *Methodology*), we hereafter report such rate  
279 of mutation accumulation per unit of replication cycle (nt<sup>-1</sup> cycle<sup>-1</sup>). Interestingly, the non-  
280 mutator lines of CoV-2-G show a significantly lower accumulation rate compared to the

281 CoV-2-D lines ( $P < 10^{-6}$ , Two-sample Kolmogorov-Smirnov test) (**Fig. 1d**). However, this  
282 difference between the two backgrounds is more likely due to differences in selection  
283 rather than differences in mutation rates, as we will explain later on.

284 The SNPs accumulated over 15 passages show that both genomic backgrounds have a  
285 strong propensity to accumulate C->T mutations (**Fig. 1e**), a well-known bias of SARS-  
286 CoV-2[28]. In the mutator lines, the main mutation bias changed from C->T to G->T (**Fig.**  
287 **1e**), also observed in SARS-CoV-2 samples collected during the recent COVID-19  
288 pandemic[29,30].

289 It is important to notice that, both the accumulation of mutations and the biases we  
290 observe in the data (**Fig. 1b-e**) might have been shaped by selection and deviate from a  
291 neutral rate and spectrum of mutations. In fact, on one hand positive selection can  
292 increase the frequencies of beneficial mutations and on the other hand purifying selection  
293 can purge the deleterious alleles. Therefore, we next looked for evidences of selection in  
294 the mutation accumulation data.

295

#### 296 **Signs of selection: Site frequency spectrum and heterogeneity across genes.**

297 In serial propagation experiments with SARS-CoV-2, it is extremely difficult to pick a  
298 single virus[31]. In our experiment the effective population size is considerably large (see  
299 *Methodology*), and thus could be insufficient to remove the effects of either positive or  
300 negative selection[10]. Indeed, several patterns in the data indicate that selection played  
301 a significant role in the experimentally evolved SARS-CoV-2 lines.

302 The distribution of allele frequencies in a sample, *i.e.* the site frequency spectrum, has a  
303 well-known theoretical expectation under a simple equilibrium neutral model of  
304 molecular evolution (Chap. 5 pg. 233 of B. Charlesworth & D. Charlesworth., 2010). But,  
305 this distribution is sensitive to the action of selection and also to complex demographic  
306 events, such as population bottlenecks. Given the bottlenecks occurring in our  
307 experiments and the slow evolutionary time elapsed during the 15 infection cycles, the  
308 neutral theoretical expectation at equilibrium may not apply. To obtain a non-  
309 equilibrium expectation of the site frequency spectrum, we performed forward-  
310 simulations (see *Methodology*). We assumed that neutral mutations occur at a rate of  
311  $3.3 \times 10^{-6} \text{ nt}^{-1} \text{ cycle}^{-1}$ , similar to that estimated from the data, and simulated populations  
312 evolving under neutrality. The site frequency spectrum of the mutations accumulated in  
313 both CoV-2-D or CoV-2-G lines deviates significantly from the neutral expectation

314 predicted by the simulations (**Fig. 2a**). High frequency mutations are not expected under  
315 neutrality (mutations with frequencies above 30% are reported in **Fig. S2**). To test  
316 whether possible contamination among wells could explain the observed site frequency  
317 spectrum, we performed additional simulations with migration (see *Methodology*). Even  
318 when considering a migration rate of 10%, the neutral site frequency spectrum is still  
319 incompatible with the experimental data (**Fig. S3a**). Furthermore, the 10% migration  
320 between wells should not significantly change the estimation of mutation rate (**Fig. S3b**).  
321 Thus, the data strongly suggest that positive selection has increased the frequency of  
322 beneficial mutations and skewed the spectrum of the mutations (**Fig. 2a**).

323 A second evidence of selection comes from the considerable variation in the rate of  
324 mutation accumulation observed across the SARS-CoV-2 genome (**Fig. 2b, Fig. S4**). When  
325 excluding the mutator lines, the S gene, which codes for the spike protein, has the highest  
326 rate of mutation accumulation among the different genes (**Fig. 2b**). Remarkably, the  
327 spike accumulated  $13.5 \pm 0.4 \times 10^{-6} \text{ nt}^{-1} \text{ cycle}^{-1}$  mutations in the CoV-2-G genotype  
328 (excluding mutators), and  $17.1 \pm 1.0 \times 10^{-6}$  in the CoV-2-D genotype, about five-fold the  
329 corresponding genomic averages, suggesting the strong action of positive selection. In the  
330 mutator lines, the spike gene evolved  $\sim 2$  times faster than the non-mutators (**Fig. S4**).  
331 This observation is in contrast with the expectation of a constant increase in mutation  
332 rate across the genome and suggests that more complex selective forces might be acting  
333 on the mutator phenotype (see the heterogeneity of the mutation rate across the CoV-2-  
334 G mutator genome in **Fig. S4**). Overall, the data confirmed that selection has shaped the  
335 way mutations accumulated. Therefore, in order to obtain a more accurate quantification  
336 of the spontaneous rate of mutation, we performed a more systematic analysis of the sites  
337 under selection.

338

### 339 **Identifying regions under selection**

340 From the frequencies of all mutations observed in the CoV-2-D and CoV-2-G non-mutator  
341 lines, we computed an accumulation rate of  $3.7 \times 10^{-6}$  and  $2.9 \times 10^{-6} \text{ nt}^{-1} \text{ cycle}^{-1}$ , respectively  
342 (**Fig. 1d**). Given that during our experiment, selection affected the allele frequencies (**Fig.**  
343 **2**), such rates may deviate from the spontaneous mutation rates of the virus. In order to  
344 attempt to estimate the spontaneous mutation rate we first focused on synonymous  
345 mutations, which, if neutral, should accumulate at the rate at which they occur[33].  
346 Focusing on the synonymous changes, we estimated a basic mutation rate of  $3.8 \times 10^{-6} \text{ nt}$

347  $1 \text{ cycle}^{-1}$  for the CoV-2-D background and  $1.2 \times 10^{-6} \text{ nt}^{-1} \text{ cycle}^{-1}$  for the CoV-2-G (**Fig. S5a**).  
348 However, the rate of non-synonymous mutation in CoV-2-D is lower than the  
349 synonymous one (**Fig. S5a-b**), suggesting the action of purifying selection on non-  
350 synonymous sites or positive selection on the synonymous sites, leading to their increase  
351 in frequency[34,35]. To distinguish between the two cases, we compared the  
352 accumulation rate of synonymous mutations in the entire genome ( $M_a^{Syn}$ ), with the  
353 accumulation rate of synonymous mutations excluding one gene at the time ( $M_a^{Syn,\Delta g}$ ).  
354 This approach revealed that a remarkable accumulation of synonymous mutations in the  
355 Nsp6 gene led to the overestimation of the mutation rate in the CoV-2-D background (**Fig.**  
356 **S5c**). In contrast, for the CoV-2-G background this approach indicates that the estimation  
357 of  $M_a^{Syn}=1.2 \times 10^{-6} \text{ nt}^{-1} \text{ cycle}^{-1}$  is homogeneous across the genome and can provide a first  
358 estimation of its mutation rate (**Fig. S5d**).

359 Since the synonymous mutations alone could not provide a correct estimation of  
360 mutation rate, we followed a different approach: identify the regions under selection in  
361 either the CoV-2-D or CoV-2-G lines and exclude them from the estimation of the  
362 spontaneous mutation rate. First, we compared the relative accumulation of non-  
363 synonymous and synonymous mutations, via the  $pN/pS$  statistics (equivalent of  $dN/dS$   
364 for polymorphic samples, see *Methodology*). In the CoV-2-D background, the  $pN/pS$  of the  
365 S and the Nsp6 genes significantly differ from 1 (**Fig. 3a**). The spike accumulated more  
366 non-synonymous mutations consistent with the action of positive selection ( $pN/pS=4.4$ ,  
367 95% confidence interval: [1.4,13.9]), while the Nsp6 accumulated more synonymous  
368 mutations, consistent with our previous findings ( $pN/pS=0.02$ , 95% confidence interval:  
369 [0.00,0.12], **Fig. S5c**). In particular, the synonymous change A11041G was found in 88  
370 evolved populations (out of 96), but also at frequency below our 1% threshold in the  
371 ancestral population, suggesting that such mutation was incorrectly considered as *de*  
372 *novo* and that the estimated mutation accumulation in Nsp6 was the resulting artifact.

373 Due to the limited number of mutations within each gene and the fact that we are  
374 comparing evolving populations (rather than divergent species), the  $pN/pS$  may lack the  
375 power to identify additional regions under selection[36]. To overcome this issue and to  
376 identify additional genes affecting the estimation of the mutation rate, we computed the  
377 rate of mutation accumulation excluding one gene at the time and compared this with the  
378 entire genome (see *Methodology* and **Fig. 3c-d**). With this outlier-detecting method we  
379 confirmed that the S and the Nsp6 genes affected the estimation of mutation rate in the

380 CoV-2-D strain, we could observe that the S gene is likely under selection also in the CoV-  
381 2-G strain, and we identified Nsp3 as an additional region with a different rate of  
382 mutation accumulation (**Fig. 3c-d**). In particular, Nsp3 accumulated fewer mutations  
383 than the genomic average in both CoV-2-D and CoV-2-G strains, suggesting the action of  
384 purifying selection (**Fig. 3c-d**).

385 Overall, we conclude that during our experiment, the spike protein was under strong  
386 selection in both backgrounds, but also other genes biased the estimation of mutation  
387 rate.

388

### 389 **Estimation of mutation rates and bias excluding genes with signs of selection**

390 Non-neutral processes have shaped the allele dynamics in our experiment. To get a more  
391 realistic estimate of the mutation rate prior to selection, we excluded from the analysis  
392 the Nsp3, Nsp6 and S genes, which have shown signs of selection in at least one of the two  
393 backgrounds (**Fig. 3**). By doing this, we estimate a spontaneous mutation rate of  
394  $1.3 \pm 0.2 \times 10^{-6} \text{ nt}^{-1} \text{ cycle}^{-1}$  for the CoV-2-D background and  $1.2 \pm 0.2 \times 10^{-6} \text{ nt}^{-1} \text{ cycle}^{-1}$  for the  
395 CoV-2-G (excluding mutators) (**Fig. 4a**). The estimated mutation rate is similar across  
396 backgrounds, suggesting that the previously observed differences were due to selection  
397 (**Fig. 1d** and **S5**). Importantly, the estimated mutation rate of CoV-2-G is consistent with  
398 that obtained using the synonymous mutations only (see **Fig. S5a**) and the estimated  
399 mutation rate of CoV-2-D is consistent with that obtained using the synonymous  
400 mutations only and excluding the Nsp6 (see **Fig. S5c**). We quantified again the relative  
401 proportion of single nucleotide changes and confirmed that both backgrounds have a  
402 spontaneous bias towards C>T mutations and the mutator changes this bias towards G>T  
403 mutations (**Fig. 4b**).

404 Excluding the genes with signs of selection was our best attempt at quantifying the  
405 spontaneous mutation rate of SARS-CoV-2. However, it is important to note that this may  
406 still underestimate the real one due to the fact that we ignored mutations with a  
407 frequency below the 1% threshold.

408

### 409 **Convergent targets of selection on Spike**

410 The spike protein showed clear signs of adaptation during our evolution experiment, so  
411 we next focused on the specific sites under selection and compared them with the new  
412 spike variants that spread in the human population. We first quantified the level of

413 convergence at the nucleotide and amino levels between CoV-2-D and CoV-2-G. We note  
414 that convergence between the two backgrounds reflects true independent origin of the  
415 mutations, as they were propagated and processed for sequencing independently. In  
416 contrast, convergence within replicates of the same background could also result from  
417 some possible cross-contamination or from undetected standing variation. At the amino  
418 level, 20 specific sites and 3 regions were hit independently in both backgrounds (**Fig.**  
419 **5a, Supplementary Table 4**). We find high evolutionary convergence at the S1/S2  
420 cleavage site: three distinct deletions (675-QTQTN-679 del; 679-NSPRRAR-685 del and  
421 679-NSPRRARSVA-688) emerge multiple times in both backgrounds. Such changes have  
422 been previously shown to emerge rapidly in Vero cells and to be important for the virus  
423 cell tropism[37]. Apart from these deletions, mutations of the Arginine 682 were also  
424 highly convergent, most likely because they trigger a similar functional effect, i.e., knock  
425 out of the furin cleavage site[38]. Notably, another deletion in this region (678-  
426 TNSPRRARS-686 del) was frequently observed, still it was exclusive of CoV-2-D lines ( $n=$   
427 58), suggesting that the conformation changes mediated by D614G may influence the  
428 directionality of the evolution towards the knock out of the furin-cleavage site[39].  
429 Some level of evolutionary convergence could also be found for the structural genes N, E  
430 and M suggesting that adaptation could also have occurred in these genes  
431 (**Supplementary Table 5**).

432 The inferred mutators in the CoV-2-G background also carry many mutations in the spike  
433 protein including in the receptor binding domain -RBD- (amino acid changes at positions  
434 328, 339, 364, 416, 454, 465, 474, 479, 482, 522 and 524) and multi cleavage site regions  
435 (positions 798 and 799) (**Fig. 5b**).

436 When scrutinizing the list of non-synonymous mutations in the spike that emerged  
437 during our experiment in both backgrounds or in the mutator lines, we found 24 amino-  
438 acid changes that were also observed in the natural population of SARS-CoV-2 (until the  
439 24th of October 2021; <https://nextstrain.org/ncov/gisaid/global>) (full list reported in  
440 **Supplementary Table 6** and highlighted in bold in **Fig. 5**). Among these, we observed  
441 the mutations H655Y (present in the variant of concern Gamma, lineage P.1, originated  
442 in Brazil), D215G (present in the variant of concern Beta, lineage B.1.351, firstly identified  
443 in South Africa) and D253G (found in lineage B.1.426, mostly detected in the US) (**Fig.**  
444 **5b**)[40].



## 445 **Conclusions and implications**

446 The SARS-CoV-2 beta-coronavirus, first observed in the Wuhan province of China[6], has  
447 infected at least 246 million people causing more than a 5 million toll of deaths in the  
448 human population (as of 2 November 2021; <https://covid19.who.int/>). Since it was first  
449 sequenced[26] the virus has been accumulating 0.44 substitutions per week at close to  
450 linear rate. Here we estimate its rate of spontaneous mutation to be of the order of  $10^{-6}$   
451 per base per cell infection, consistent with previous estimations in other  
452 coronaviruses[9]. New beneficial mutations did spread to high frequencies and  
453 considerable convergent evolution was detected across different genomic backgrounds.  
454 We also observe viral populations with an increased mutation rate emerging just within  
455 15 days of propagation in cells. This suggests that the mutation rate of SARS-CoV-2 can  
456 increase without significant loss of viability (at least in the short run) and that strategies  
457 to reduce viral fitness using mutagens should be tested with precaution[41,42].  
458 Overall the results show the remarkable ability of SARS-CoV-2 to adapt to new  
459 environments, in particular via convergent evolution of its spike protein in cells, and is  
460 fully consistent to its rapid adaptation to different hosts[43,44].

461

## 462 **Data and materials availability**

463 SARS-CoV-2 consensus genome sequences obtained directly from clinical samples for  
464 CoV-2-D (Portugal/PT0054/2020) and CoV-2-G (Portugal/PT1136/2020) viruses are  
465 available in GISAID under the accession numbers EPI\_ISL\_421457 and EPI\_ISL\_511683,  
466 respectively. Reads generated throughout the experimental evolution in this study were  
467 deposited in the European Nucleotide Archive (ENA)  
468 (<https://www.ebi.ac.uk/ena/data/view/PRJEB43731>). The code for the neutral model  
469 was deposited on <https://github.com/AmiconeM/neutralviralpassage>.

470

471 **Acknowledgments:** We would like to thank the personnel of the IGC Genomic Facility  
472 for their assistance.

473

474 **Funding:** M.A. was supported by “Fundação para a Ciência e Tecnologia” (FCT),  
475 fellowships PD/BD/138735/2018, respectively. Research was supported by FCT  
476 Project PTDC/BIA-EVL/31528/2017 to I.G. and by funds from Portuguese NIH.

477

478 **Author contributions:** IG, MJA and JPG designed the project. MJA and LZZ performed the  
479 culture and RNA extraction experiments. VB and JI performed the pre-sequencing wet-  
480 lab procedures, bioinformatic analysis and data analysis. SD and LV performed and  
481 supervised the wet-lab sequencing procedures. IG, MA performed the data analysis and  
482 the simulations. MJA, LV and JPG provided materials and reagents. IG wrote the initial  
483 draft of manuscript. VB, MJA, MA and JI contributed equally to this work. All authors  
484 contributed in the final writing of the manuscript and gave final approval for publication.

485

486 **Ethical statement:** The Portuguese NIH is authorized by the Portuguese Authorities’  
487 (General-Directorate of Health and the Authority for Working Conditions) to handle and  
488 propagate Risk group 2 and 3 microorganisms. All culture procedures were performed  
489 inside a class III microbiological safety cabinet in a containment level 3 facility. This study  
490 is covered by the ethical approval issued by the Ethical Committee (“Comissão de Ética  
491 para a Saúde”) of the Portuguese National Institute of Health.

492

493 **Competing interests:** The authors declare no competing interests.

494

495 **Additional information:** Supplementary information is available for this paper.

496 Correspondence and requests for materials should be addressed to

497 [igordo@igc.gulbenkian.pt](mailto:igordo@igc.gulbenkian.pt); [j.paulo.gomes@insa.min-saude.pt](mailto:j.paulo.gomes@insa.min-saude.pt).

498

## 499 **References**

- 500 1. Lin JJ, Bhattacharjee MJ, Yu CP *et al.* Many human RNA viruses show extraordinarily  
501 stringent selective constraints on protein evolution. *Proc Natl Acad Sci U S A* 2019, DOI:  
502 10.1073/pnas.1907626116.
- 503 2. Drake JW. A constant rate of spontaneous mutation in DNA-based microbes. *Proc Natl*  
504 *Acad Sci U S A* 1991, DOI: 10.1073/pnas.88.16.7160.
- 505 3. Drake JW. Rates of spontaneous mutation among RNA viruses. *Proc Natl Acad Sci U S*  
506 *A* 1993, DOI: 10.1073/pnas.90.9.4171.
- 507 4. Drake JW, Charlesworth B, Charlesworth D *et al.* Rates of spontaneous mutation.  
508 *Genetics* 1998, DOI: 10.1093/genetics/148.4.1667.
- 509 5. Sanjuán R, Nebot MR, Chirico N *et al.* Viral Mutation Rates. *J Virol* 2010, DOI:  
510 10.1128/jvi.00694-10.
- 511 6. Zhu N, Zhang D, Wang W *et al.* A Novel Coronavirus from Patients with Pneumonia in  
512 China, 2019. *N Engl J Med* 2020, DOI: 10.1056/nejmoa2001017.
- 513 7. Eckerle LD, Lu X, Sperry SM *et al.* High Fidelity of Murine Hepatitis Virus Replication  
514 Is Decreased in nsp14 Exoribonuclease Mutants. *J Virol* 2007;**81**:12135–44.
- 515 8. Eckerle LD, Becker MM, Halpin RA *et al.* Infidelity of SARS-CoV Nsp14-exonuclease  
516 mutant virus replication is revealed by complete genome sequencing. *PLoS Pathog*  
517 2010;**6**:1–15.
- 518 9. Bar-On YM, Flamholz A, Phillips R *et al.* Sars-cov-2 (Covid-19) by the numbers. *Elife*  
519 2020, DOI: 10.7554/eLife.57309.
- 520 10. Chao L. Fitness of RNA virus decreased by Muller's ratchet. *Nature* 1990, DOI:  
521 10.1038/348454a0.
- 522 11. Duarte E, Clarke D, Moya A *et al.* Rapid fitness losses in mammalian RNA virus clones  
523 due to Muller's ratchet. *Proc Natl Acad Sci U S A* 1992, DOI: 10.1073/pnas.89.13.6015.

- 524 12. Lynch M, Ackerman MS, Gout JF *et al.* Genetic drift, selection and the evolution of the  
525 mutation rate. *Nat Rev Genet* 2016, DOI: 10.1038/nrg.2016.104.
- 526 13. Bull JJ, Badgett MR, Wichman HA *et al.* Exceptional convergent evolution in a virus.  
527 *Genetics* 1997, DOI: 10.1093/genetics/147.4.1497.
- 528 14. Tenaillon O, Rodríguez-Verdugo A, Gaut RL *et al.* The molecular diversity of adaptive  
529 convergence. *Science (80- )* 2012, DOI: 10.1126/science.1212986.
- 530 15. Borges V, Isidro J, Cortes-Martins H *et al.* Massive dissemination of a SARS-CoV-2  
531 Spike Y839 variant in Portugal. *Emerg Microbes Infect* 2020, DOI:  
532 10.1080/22221751.2020.1844552.
- 533 16. Reed LJ, Muench H. A simple method of estimating fifty per cent endpoints. *Am J*  
534 *Epidemiol* 1938, DOI: 10.1093/oxfordjournals.aje.a118408.
- 535 17. Quick J, Grubaugh ND, Pullan ST *et al.* Multiplex PCR method for MinION and  
536 Illumina sequencing of Zika and other virus genomes directly from clinical samples. *Nat*  
537 *Protoc* 2017, DOI: 10.1038/nprot.2017.066.
- 538 18. Borges V, Pinheiro M, Pechirra P *et al.* INSaFLU: An automated open web-based  
539 bioinformatics suite “from-reads” for influenza whole-genome-sequencing-based  
540 surveillance. *Genome Med* 2018, DOI: 10.1186/s13073-018-0555-0.
- 541 19. Li H, Durbin R. Fast and accurate short read alignment with Burrows-Wheeler  
542 transform. *Bioinformatics* 2009, DOI: 10.1093/bioinformatics/btp324.
- 543 20. Wilm A, Aw PPK, Bertrand D *et al.* LoFreq: A sequence-quality aware, ultra-sensitive  
544 variant caller for uncovering cell-population heterogeneity from high-throughput  
545 sequencing datasets. *Nucleic Acids Res* 2012, DOI: 10.1093/nar/gks918.
- 546 21. Albers CA, Lunter G, MacArthur DG *et al.* Dindel: Accurate indel calls from short-read  
547 data. *Genome Res* 2011, DOI: 10.1101/gr.112326.110.
- 548 22. McLaren W, Gil L, Hunt SE *et al.* The Ensembl Variant Effect Predictor. *Genome Biol*

- 549 2016, DOI: 10.1186/s13059-016-0974-4.
- 550 23. Mercatelli D, Triboli L, Fornasari E *et al.* Coronapp: A web application to annotate  
551 and monitor SARS-CoV-2 mutations. *J Med Virol* 2021;**93**:3238–45.
- 552 24. Core R Team. A Language and Environment for Statistical Computing. *R Found Stat*  
553 *Comput* 2019.
- 554 25. Korber B, Fischer WM, Gnanakaran S *et al.* Tracking Changes in SARS-CoV-2 Spike:  
555 Evidence that D614G Increases Infectivity of the COVID-19 Virus. *Cell* 2020, DOI:  
556 10.1016/j.cell.2020.06.043.
- 557 26. Wu F, Zhao S, Yu B *et al.* A new coronavirus associated with human respiratory  
558 disease in China. *Nature* 2020, DOI: 10.1038/s41586-020-2008-3.
- 559 27. Eskier D, Suner A, Oktay Y *et al.* Mutations of SARS-CoV-2 nsp14 exhibit strong  
560 association with increased genome-wide mutation load. *PeerJ* 2020, DOI:  
561 10.7717/peerj.10181.
- 562 28. Matyášek R, Kovařík A. Mutation patterns of human SARS-CoV-2 and bat RATG13  
563 coronavirus genomes are strongly biased towards C>U transitions, indicating rapid  
564 evolution in their hosts. *Genes (Basel)* 2020, DOI: 10.3390/genes11070761.
- 565 29. Yi K, Kim SY, Bleazard T *et al.* Mutational spectrum of SARS-CoV-2 during the global  
566 pandemic. *Exp Mol Med* 2021;**53**:1229–37.
- 567 30. Tonkin-Hill G, Martincorena I, Amato R *et al.* Patterns of within-host genetic  
568 diversity in SARS-COV-2. *Elife* 2021, DOI: 10.7554/eLife.66857.
- 569 31. Szemiel AM, Merits A, Orton RJ *et al.* In vitro selection of Remdesivir resistance  
570 suggests evolutionary predictability of SARS-CoV-2. *PLOS Pathog* 2021, DOI:  
571 10.1371/journal.ppat.1009929.
- 572 32. JIGGINS C. Elements of Evolutionary Genetics. B. Charlesworth & D. Charlesworth.  
573 Roberts & Company. 2010. 768 pages. ISBN 9780981519425. Price \$80 (hardback).

- 574 *Genet Res (Camb)* 2010, DOI: 10.1017/s001667231000042x.
- 575 33. Kimura M. Evolutionary rate at the molecular level. *Nature* 1968, DOI:  
576 10.1038/217624a0.
- 577 34. Novella IS, Zárata S, Metzgar D *et al*. Positive selection of synonymous mutations in  
578 vesicular stomatitis virus. *J Mol Biol* 2004, DOI: 10.1016/j.jmb.2004.08.003.
- 579 35. Zanini F, Neher RA. Quantifying Selection against Synonymous Mutations in HIV-1  
580 env Evolution. *J Virol* 2013, DOI: 10.1128/jvi.01529-13.
- 581 36. Kryazhimskiy S, Plotkin JB. The population genetics of dN/dS. *PLoS Genet* 2008, DOI:  
582 10.1371/journal.pgen.1000304.
- 583 37. Sasaki M, Uemura K, Sato A *et al*. SARS-CoV-2 variants with mutations at the S1/ S2  
584 cleavage site are generated in vitro during propagation in TMPRSS2-deficient cells. *PLoS*  
585 *Pathog* 2021;**17**:1–17.
- 586 38. Liu Z, Zheng H, Lin H *et al*. Identification of Common Deletions in the Spike Protein of  
587 Severe Acute Respiratory Syndrome Coronavirus 2. *J Virol* 2020, DOI:  
588 10.1128/jvi.00790-20.
- 589 39. Gobeil SMC, Janowska K, McDowell S *et al*. D614G Mutation Alters SARS-CoV-2 Spike  
590 Conformation and Enhances Protease Cleavage at the S1/S2 Junction. *Cell Rep* 2021,  
591 DOI: 10.1016/j.celrep.2020.108630.
- 592 40. Makoni M. South Africa responds to new SARS-CoV-2 variant. *Lancet (London,*  
593 *England)* 2021, DOI: 10.1016/S0140-6736(21)00144-6.
- 594 41. Jensen JD, Stikeleather RA, Kowalik TF *et al*. Imposed mutational meltdown as an  
595 antiviral strategy. *Evolution (N Y)* 2020, DOI: 10.1111/evo.14107.
- 596 42. Jensen JD, Lynch M. Considering mutational meltdown as a potential SARS-CoV-2  
597 treatment strategy. *Heredity (Edinb)* 2020, DOI: 10.1038/s41437-020-0314-z.
- 598 43. Gu H, Chen Q, Yang G *et al*. Adaptation of SARS-CoV-2 in BALB/c mice for testing



599 vaccine efficacy. *Science* (80-) 2020, DOI: 10.1126/science.abc4730.

600 44. Tegally H, Wilkinson E, Giovanetti M *et al.* Emergence of a SARS-CoV-2 variant of

601 concern with mutations in spike glycoprotein. *Nature* 2021, DOI: 10.1038/s41586-021-

602 03402-9.

603

604 **Figures**

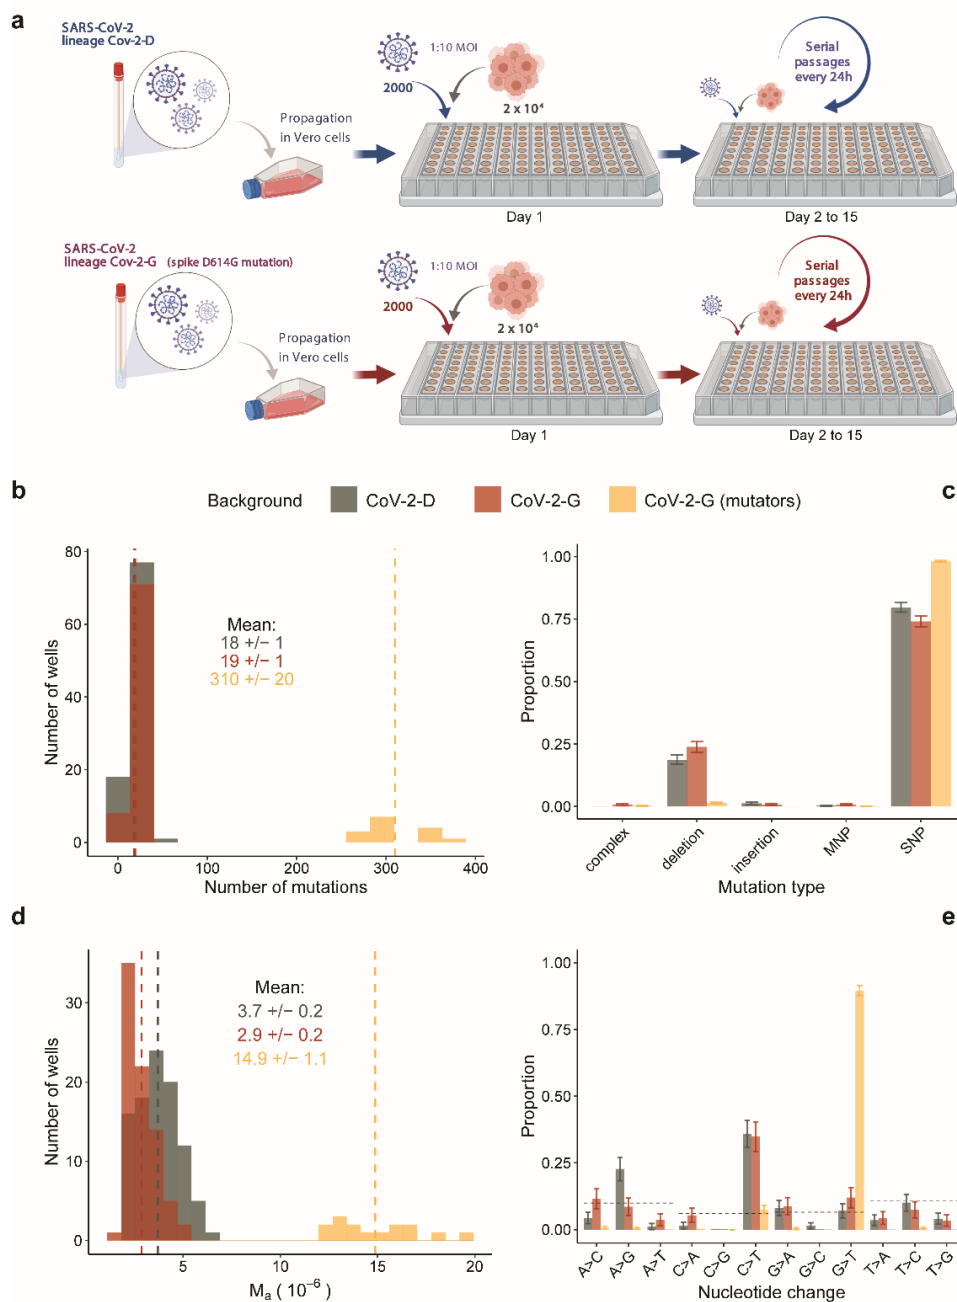

605

606 **Fig. 1| Experimental design and mutation accumulation after 15 passages of SARS-**  
607 **CoV-2 evolution. a**, Schematic of the experimental design of the mutation accumulation  
608 experiments where two viral backgrounds were propagated in Vero cells (figure created  
609 with BioRender.com). **b**, Number of mutations observed in each well and group. 15 lines of  
610 the CoV-2-G background accumulated a larger number of mutations and thus were defined  
611 as mutators (gold). The means of each group are presented by vertical dashed lines and  
612 reported in the figure (+/- 2SEM). **c**, Proportion of mutation types in each group. Complex  
613 mutations and multi-nucleotide polymorphisms (MNP) are defined in the *Methodology*. **d**,  
614 Mutation accumulation per base per infection cycle ( $M_a$ ) was calculated by summing the  
615 observed mutation frequencies as:  $M_a = \frac{\sum f}{P * G}$ , where  $P$  is the number of passages ( $P=15$ )  
616 and  $G$  is the SARS-CoV-2 genome length ( $G=29903$ ). The means of each group are  
617 presented by vertical dashed lines and reported in the figure (+/- 2SEM). **e**, Proportion of  
618 observed nucleotide changes. Dashed lines indicate the expectation given the genome  
619 composition under equal mutation probability for each type of nucleotide change. Vertical  
620 bars in panels **c** and **e** represent the 95% confidence interval computed as  $p \pm$

621  $z \sqrt{\frac{p(1-p)}{N}}$ ,  $z = 1.96$ .

622

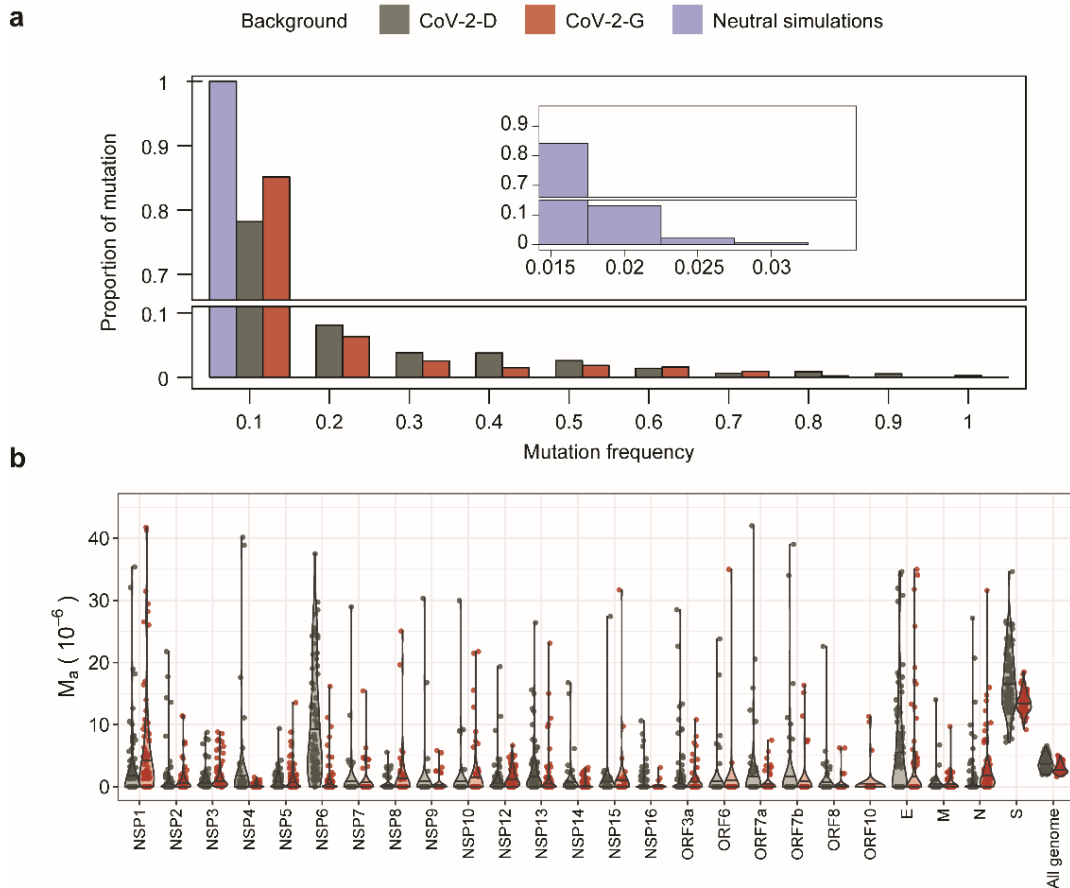

623

624 **Fig. 2| Site frequency spectrum and heterogeneity across genes. a**, Proportion of  
 625 mutations with a given frequency after 15 cycles of propagation in the CoV-2-D and  
 626 CoV-2-G genetic background or under a simulated neutral model of mutation  
 627 accumulation. The bump observed at high frequencies in the data is not compatible with  
 628 the expectation of the neutral model. **b**, Per-base mutation accumulation ( $M_a$ ) computed  
 629 for each gene and for the entire genome shows heterogeneity. The spike gene has the  
 630 largest accumulation rate in both backgrounds ( $M_a^{(S)} = 17.1 \pm 1.0, 13.5 \pm 0.4 \cdot 10^{-6}$ ,  
 631 for the CoV-2-D and CoV-2-G respectively), which is more than 4 times their genomic  
 632 average. For resolution purposes, few outliers with  $M_a$  above 45 are not shown (see full  
 633 set in **Fig. S4**).

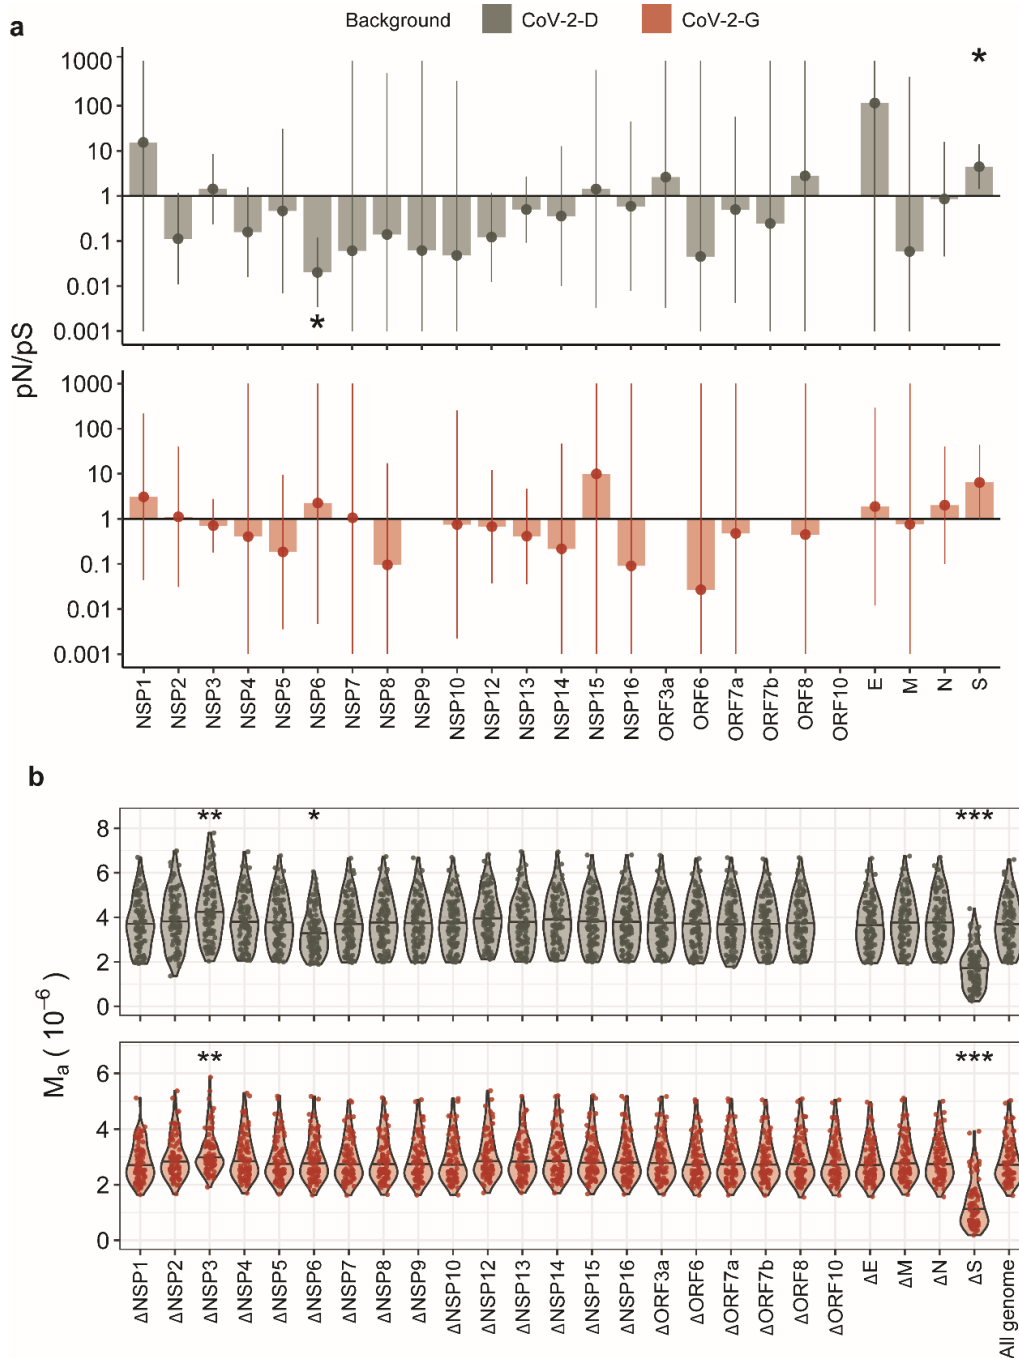

634

635 **Fig. 3| Gene-wise signs of selection. a**, The relative proportion of non-synonymous to

636 synonymous polymorphism,  $pN/pS$ , was computed for each gene and genetic

637 background (see *Methodology*). The horizontal line indicates the expectation under

638 neutrality ( $pN/pS=1$ ), values above suggest positive selection while values below

639 suggest purifying selection. Vertical bars show the 95% confidence intervals and the

640 stars indicate the genes where such interval does not include 1. For the sake of

641 resolution, we show the confidence intervals within the  $[10^{-3}, 10^3]$  range. **b**, Identifying

642 the genes that affect the estimation of mutation rate. Per-base mutation accumulation

643 ( $M_a$ ) was computed for the entire genome or by excluding each gene on at the time (e.g.  
 644  $\Delta S$ ). The stars indicate the cases where removing the gene leads to an estimation of  $M_a$   
 645 significantly different from the all genome (non-parametric Wilcox test, p-value < 0.05  
 646 (\*), 0.01 (\*\*), or 0.001 (\*\*\*)).  
 647

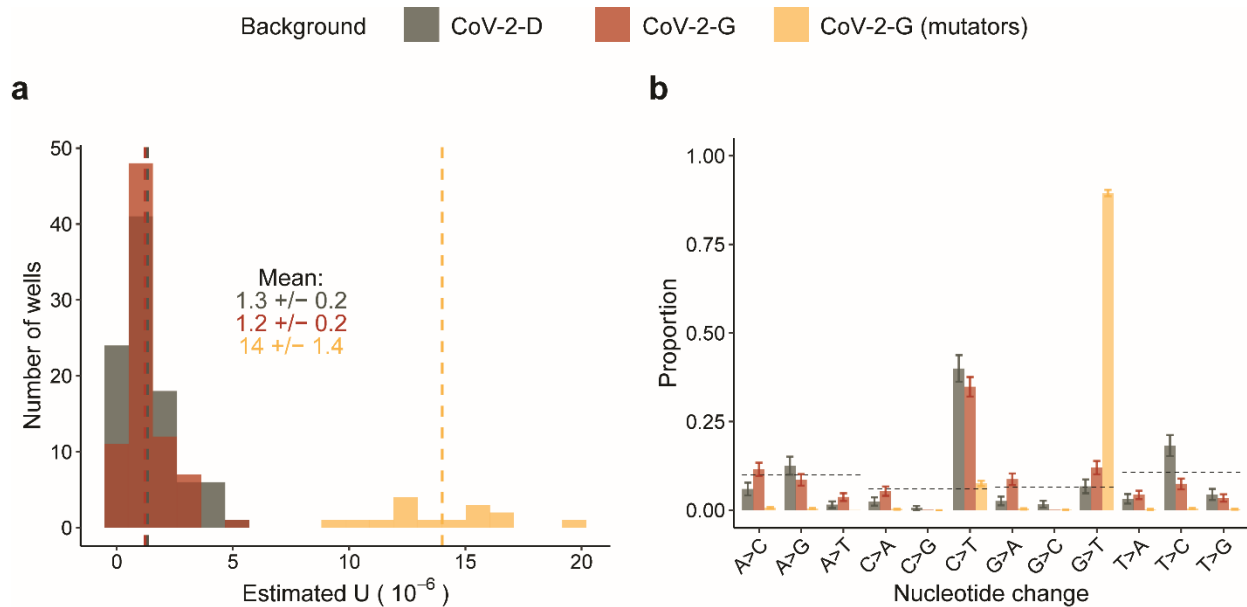

648  
 649 **Fig. 4| Estimation of mutation rates and bias excluding outlier genes. a,** The per-  
 650 base per-infection cycle mutation rate was calculated by summing the observed  
 651 mutation frequencies as:  $U = \frac{\sum f}{P * G}$ , where  $P$  is the number of passages ( $P=15$ ) and  $G$  is the  
 652 length of SARS-CoV-2 genome excluding the Nsp3, Nsp6 and Spike genes (29903-5835-  
 653 870-3822=19376). The means of each group are presented as vertical dashed lines and  
 654 reported in the figure (+/- 2SEM). **b,** Proportion of nucleotide changes observed  
 655 excluding the Nsp3, Nsp6 and Spike genes. Dotted lines indicate the expectation given  
 656 the genome composition under equal mutation probability for each type of nucleotide  
 657 change. Vertical bars represent the 95% confidence interval computed as  $p \pm$

658  $z \sqrt{\frac{p(1-p)}{N}}$ ,  $z = 1.96$ .

659

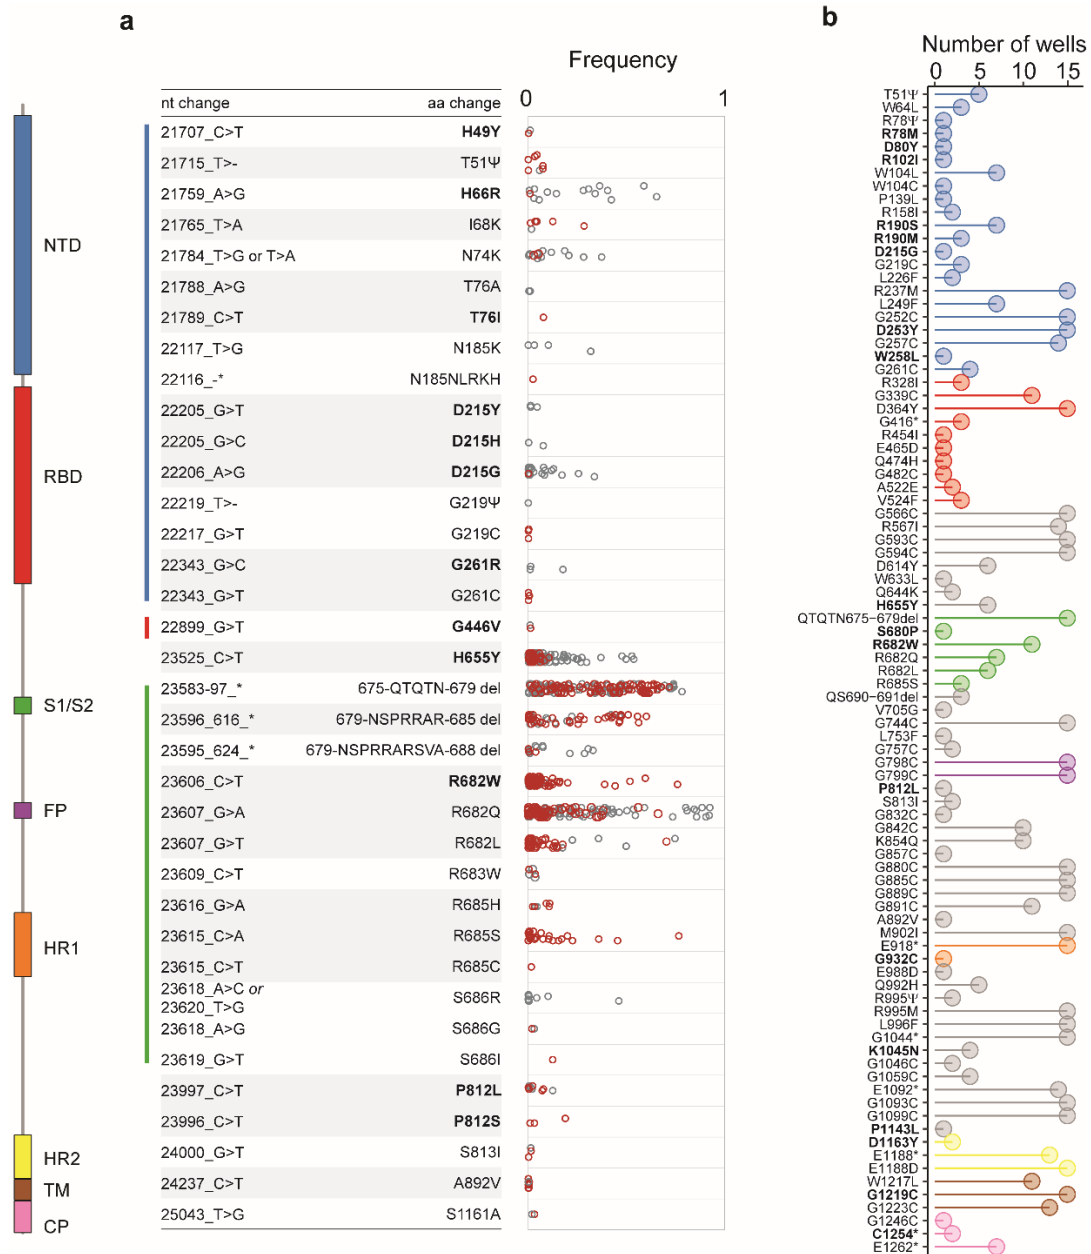

660

661 **Fig. 5| Convergent evolution in the Spike gene. a**, Mutations on S observed in both  
 662 CoV-2-D and CoV-2-G backgrounds and their frequencies in each well (open circles). **b**,  
 663 Non-synonymous mutations on the spike detected in the populations where the  
 664 mutators were observed (number of wells on the X-axis). The color annotation  
 665 represents the N-terminal domain (NTD, 14–305), the receptor-binding domain (RBD,  
 666 319–541), the cleavage site (S1/S2, 669-688), the fusion peptide (FP, 788–806), the  
 667 heptapeptide repeat sequences (HR1, 912–984 and HR2, 1163–1213), the TM domain  
 668 (1213–1237), and cytoplasm domain (CP, 1237–1273). Amino acids changes in bold  
 669 were also observed in the human population (as of 24 October 2021;  
 670 <https://nextstrain.org/ncov/gisaid/global>) (full list in **Supplementary Table 6**).
